# Supplementary material for: Transient anti-interferon autoantibodies in the airways are associated with efficient recovery from COVID-19
Source: bioRxiv or medRxiv preprint supplement (doi:10.1101/2024.01.11.24301000), 2024-01-11
Supplement: Supplementary file [file media-2.pdf]

| Ag # | Ag Class           | Protein    | MW (kDa) | Source          | Cell Line | Cat#          |
|------|--------------------|------------|----------|-----------------|-----------|---------------|
| 1    | SCV2 Structural    | RBD        | 30       | GenScript       | HEK293    | Z03483-1      |
| 2    | SCV2 Structural    | Spike S1   | 76.9     | Acro Biosystems | HEK293    | S1N-C52H3     |
| 3    | SCV2 Structural    | Spike S2   | 60       | Acro Biosystems | HEK293    | S2N-C52H5     |
| 4    | SCV2 Structural    | NP (ORF9a) | 47       | RayBioTech      | HEK293    | 230-30164-100 |
| 5    | SCV2 Structural    | E (ORF4)   | 50.2     | Chempartner     | HEK293    |               |
| 6    | SCV2 Structural    | M (ORF5)   | 66.9     | Chempartner     | HEK293    |               |
| 7    | SCV2 Nonstructural | ORF3a      | 34.4     | Chempartner     | HEK293    |               |
| 8    | SCV2 Nonstructural | ORF3b      | 48.3     | Chempartner     | HEK293    |               |
| 9    | SCV2 Nonstructural | ORF8       | 15.4     | Chempartner     | HEK293    |               |
| 10   | SCV2 Nonstructural | ORF9b      | 14.2     | Chempartner     | HEK293    |               |
| 11   | SCV2 Nonstructural | NSP1       | 23.2     | Chempartner     | HEK293    |               |
| 12   | SCV2 Nonstructural | NSP2       | 74       | Chempartner     | HEK293    |               |
| 13   | SCV2 Nonstructural | NSP7       | 12.812   | Chempartner     | HEK293    |               |
| 14   | SCV2 Nonstructural | NSP8       | 25.453   | Chempartner     | HEK293    |               |
| 15   | SCV2 Nonstructural | NSP12      | 110.03   | Chempartner     | HEK293    |               |
| 16   | Autoreactive       | IFNomega   | 19.9     | Sigma Aldrich   | E. Coli   | SRP3061       |
| 17   | Autoreactive       | IFNa2a     | 19.2     | Miltenyi        | E. Coli   | 130-093-874   |
| 18   | Autoreactive       | 9G4        | 150      | Sanz Lab        | N/A       |               |
| 19   | Internal Control   | BSA        | 66       | Sigma-Aldrich   | N/A       | B6917         |
| 20   | VOC Structural     | BA.4/5 NP  | 47.1     | Acro Biosystems | HEK293    | NUN-C52Hx     |
| 21   | VOC Structural     | BA.4/5 RBD | 28.3     | Acro Biosystems | HEK293    | SPD-C82Ew     |
| 22   | VOC Structural     | Delta RBD  | 26.6     | Sino Biological | HEK293    | 40592-V08H90  |

**Table S1: FlowBEAT antigens**

List of all 22 flowBEAT antigens, including SARS-CoV-2 structural and non-structural viral antigens, internal controls, human autoantigens and SARS-CoV-2 variant antigens.

**A**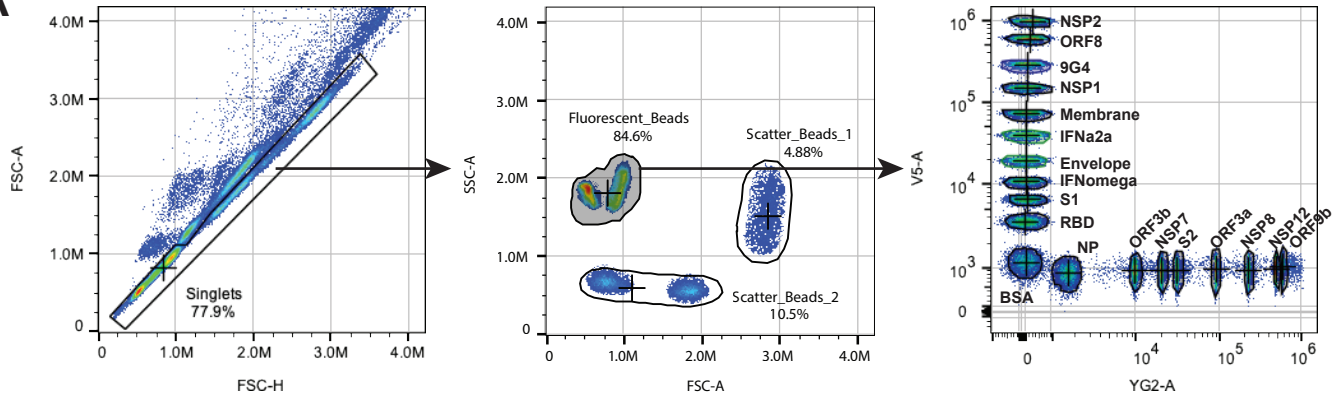**B****Bead/antigen saturation****Monoclonal Ab reveal**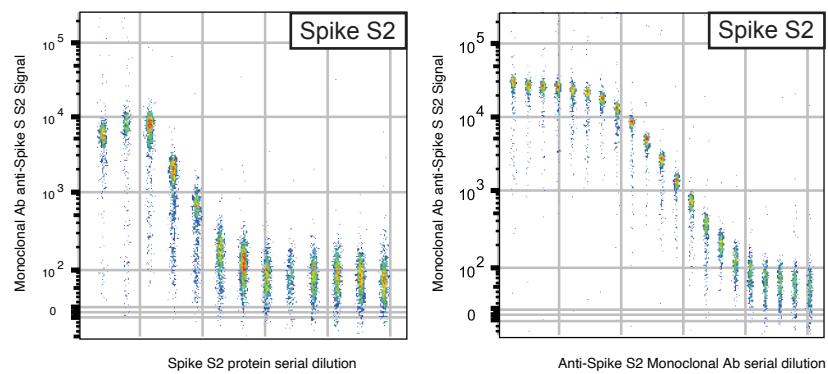**C****Single-color stains of USA Std (Anti-RBD)**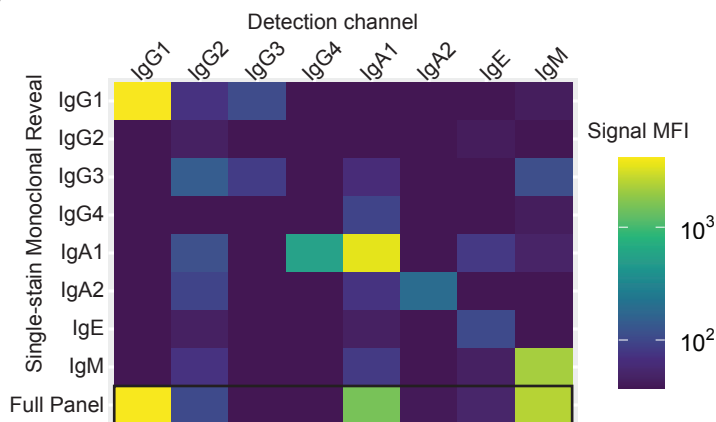**D**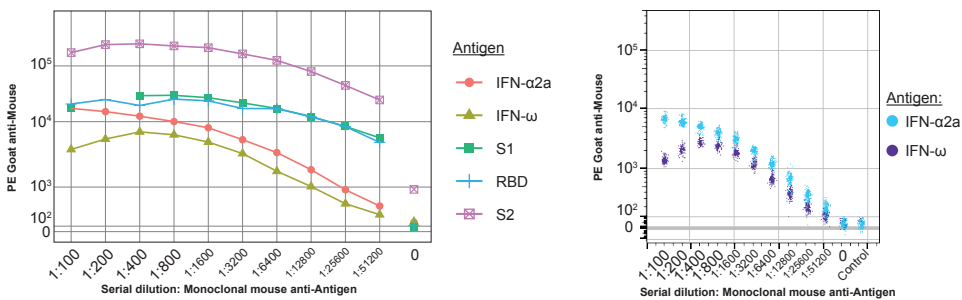**E**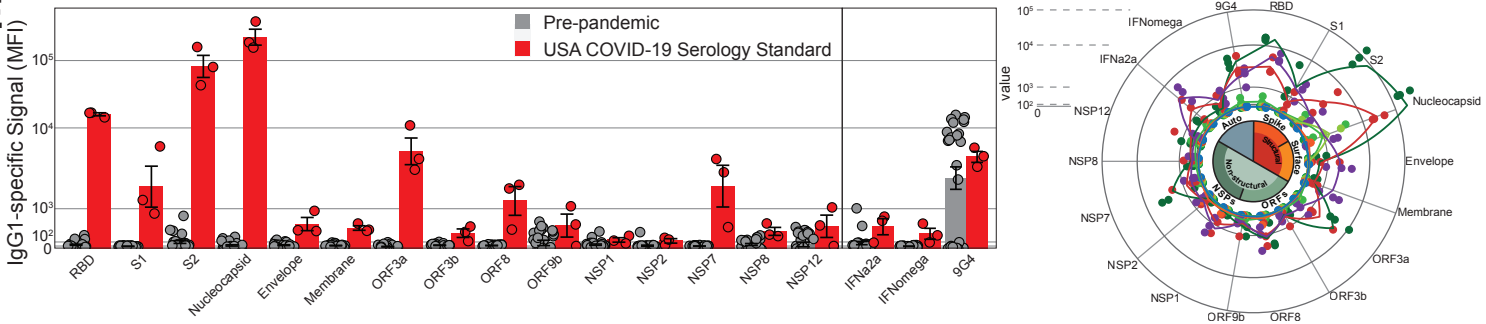

**Fig. S1: FlowBEAT validation and reproducibility**

(A) FlowBEAT gating strategy for 19 fluorescent + 3 scatter-discriminated bead species (22 bead species). (B) Leftmost plot: determination of bead-antigen saturation point by serial dilution (X-axis) of biotin-conjugated spike S2 antigen in the presence of a constant amount of beads in constant volume. Reveal signal generated by monoclonal mouse anti-S2 antibody with a secondary goat anti-mouse fluorescence. Rightmost plot: determination of sensitivity by serial dilution of monoclonal mouse anti-S2 antibody, serially diluted (X-axis) and staining S2-saturated beads, revealed by a secondary goat anti-mouse fluorescence. (C) Single-color stains reveal isotype specificity of flowBEAT assay. (D) Antigen-specificity demonstrated by antigen-specific monoclonal mouse anti-IFN- $\omega$ , anti-IFN- $\alpha$ 2a, and anti-spike RBD, S1, S2 revealed by PE goat anti-mouse (Y-axis). (E) Bar plot of IgG1 anti-SARS-CoV-2 and autoantigens between pre-pandemic (grey) and USA SARS-CoV-2 serology standard (red). (Sunburst plot demonstrates total antigen reactivity in three independent replicates of USA SARS-CoV-2 serology standard.

**A**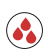

### Systemic anti-IFN Serial Dilutions

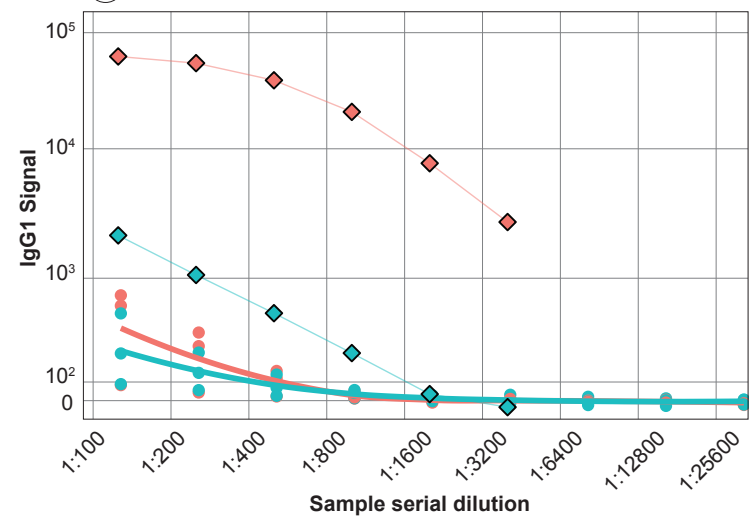**B**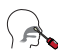

### Nasal Swab anti-IFN Serial Dilutions

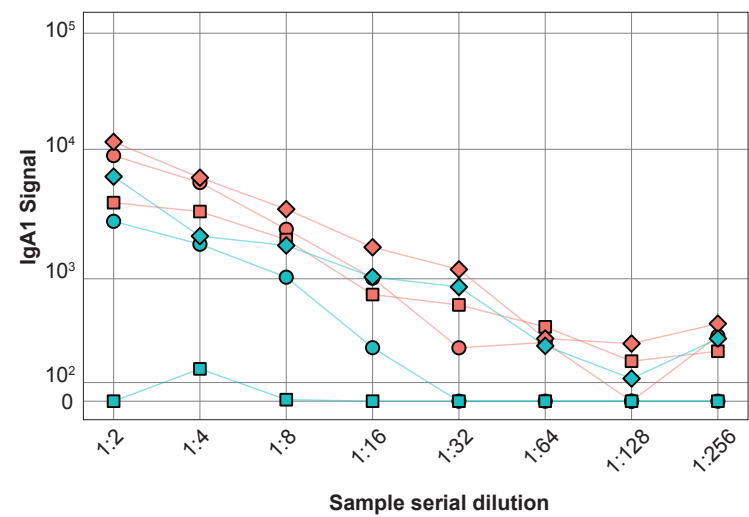

**Fig. S2: Serial dilution of anti-IFN- $\alpha$ 2a positive samples to validate anti-IFN- $\alpha$ 2a and anti-IFN- $\omega$  signals**  
(A) Serial dilution of mild-infected blood anti-IFN IgG1 signals from one donor, and triplicate dilutions of blood anti-IFN signals from the USA serology standard. (B) Serial dilution of mild-infected nasal anti-IFN IgA1 signals.

**A**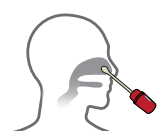**Nasal anti-viral antibodies**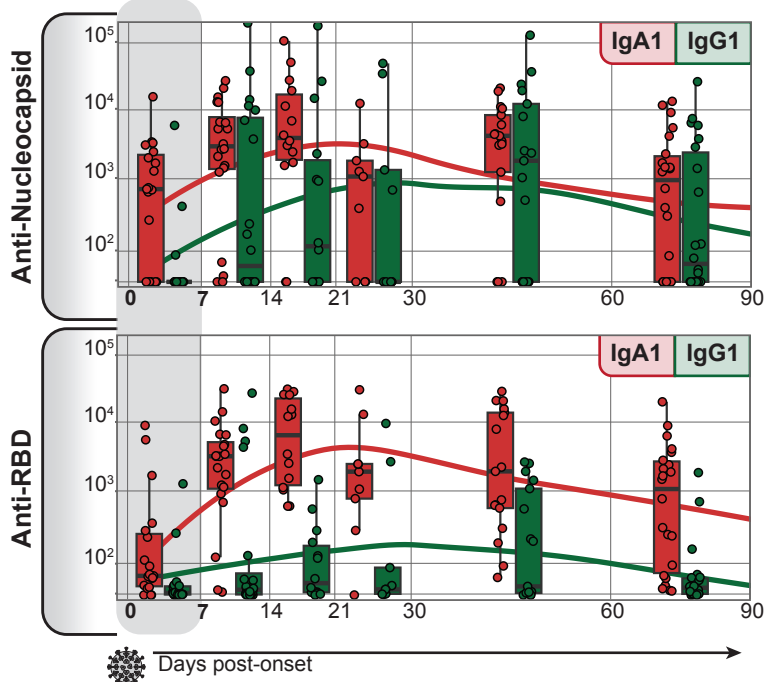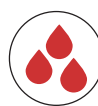**Systemic anti-viral antibodies**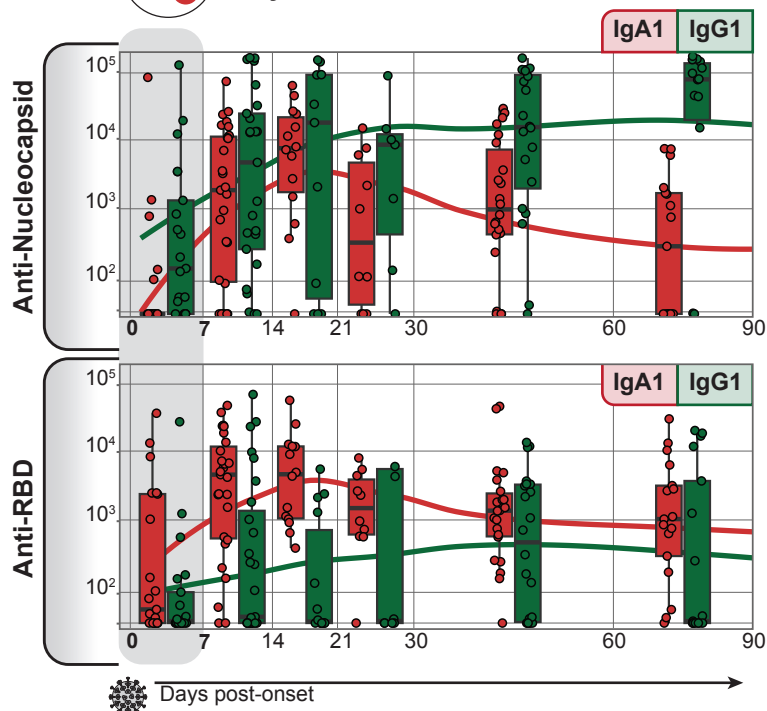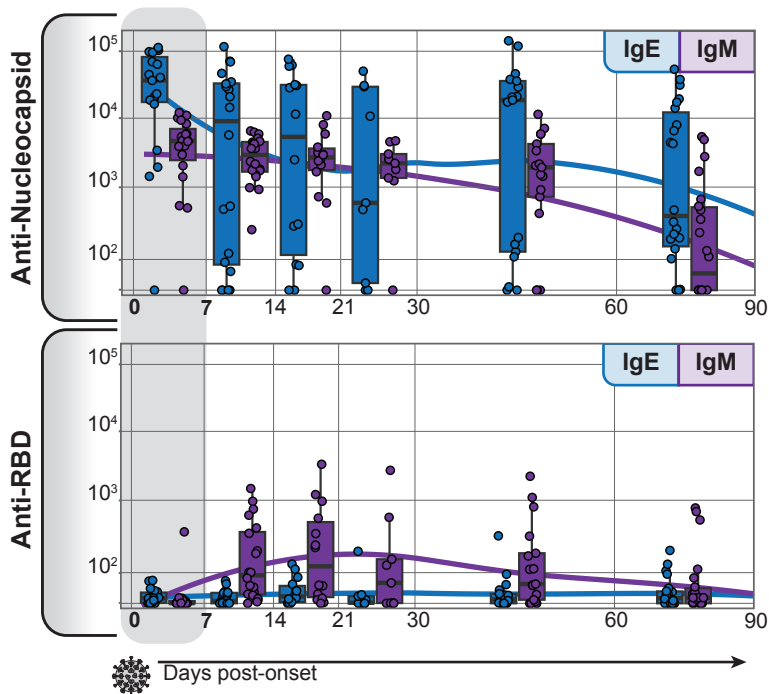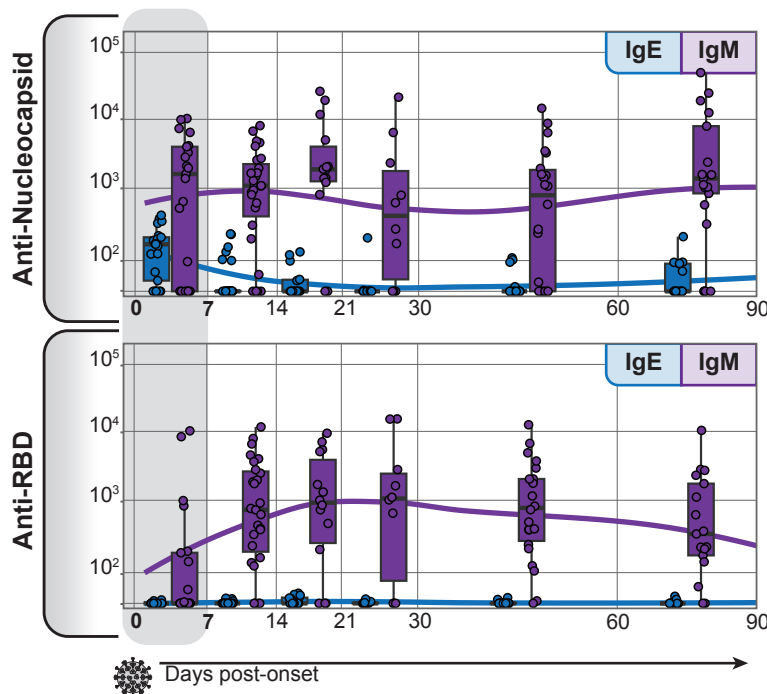

**Fig. S3: Antibody isotype response to COVID-19 infection +/- vaccination in airway mucosa and blood**  
**(A)** Box plots (binned by weeks post-onset) and trendlines (drawn from non-binned data) for mild- and moderate-infected airway and systemic anti-RBD and anti-Nucleocapsid signals, with IgA1 and IgG1 or IgE and IgM values plotted, as indicated.



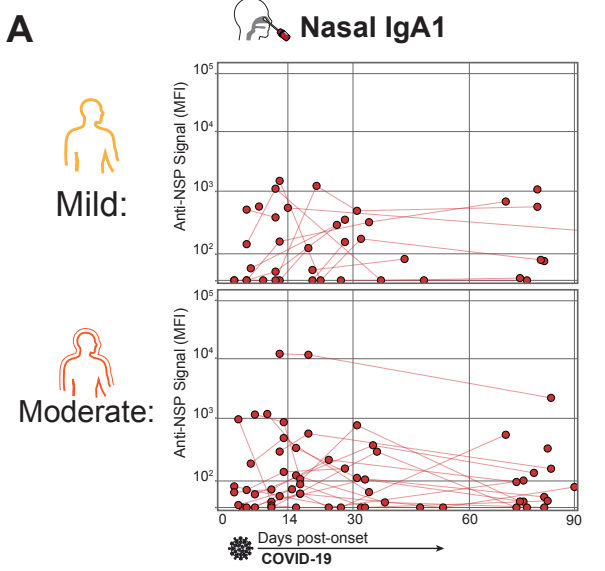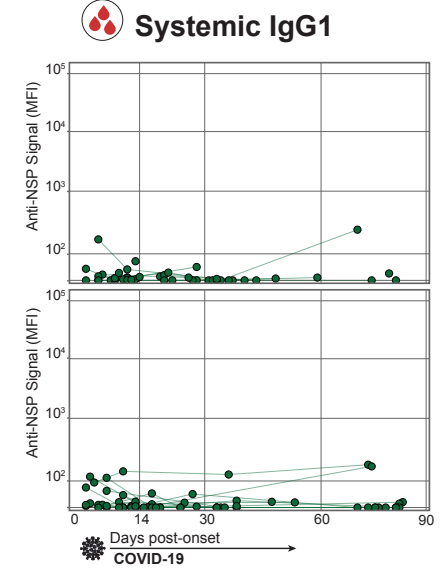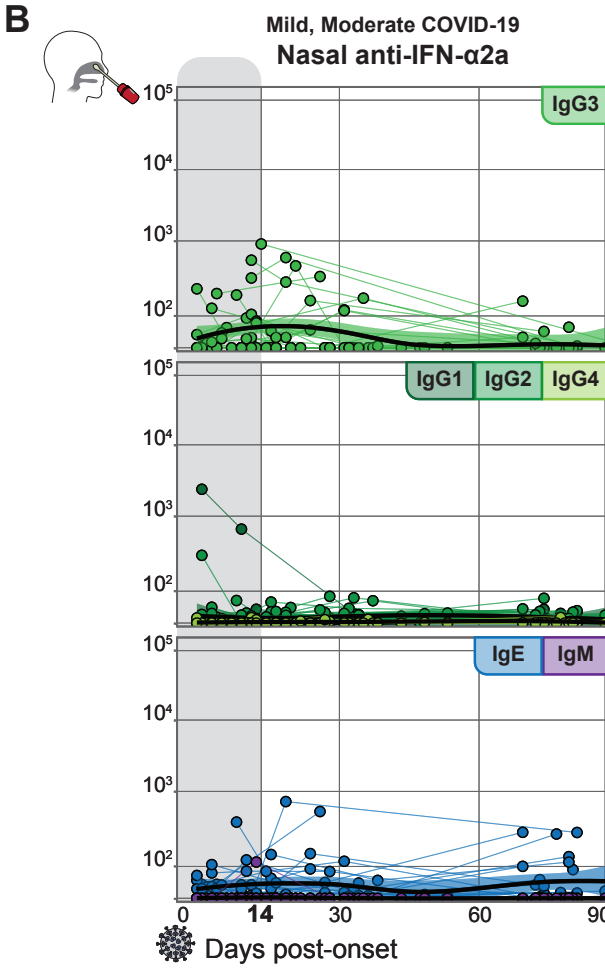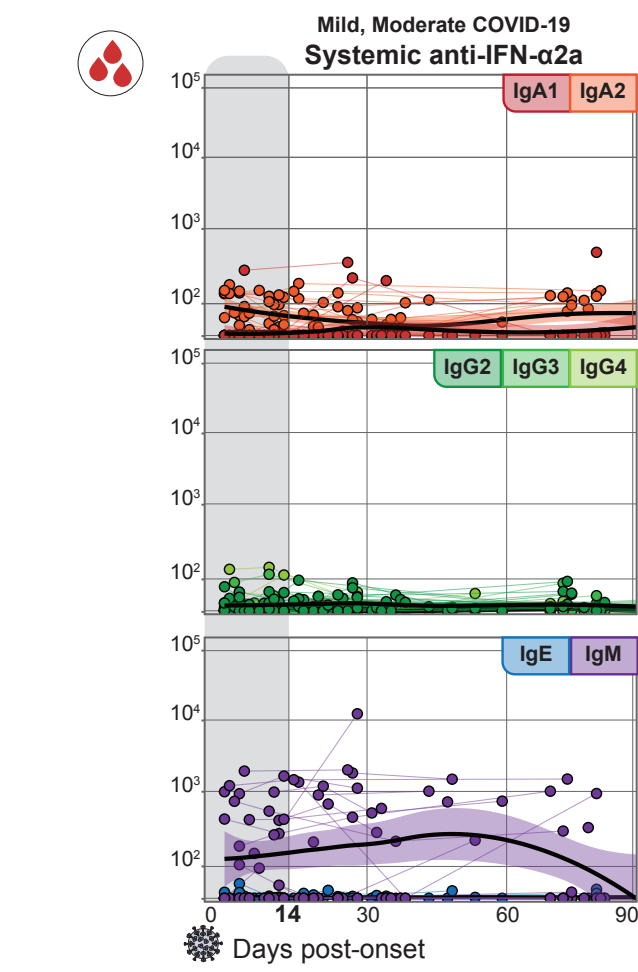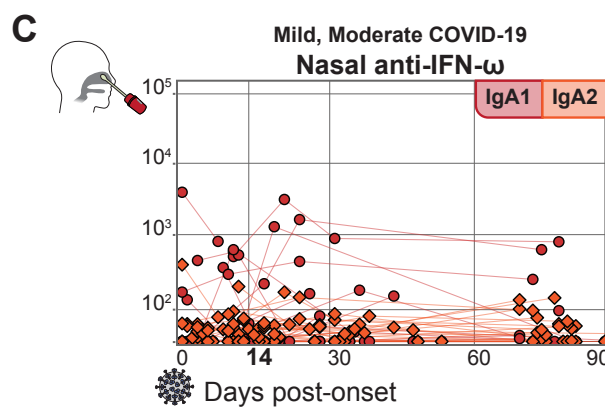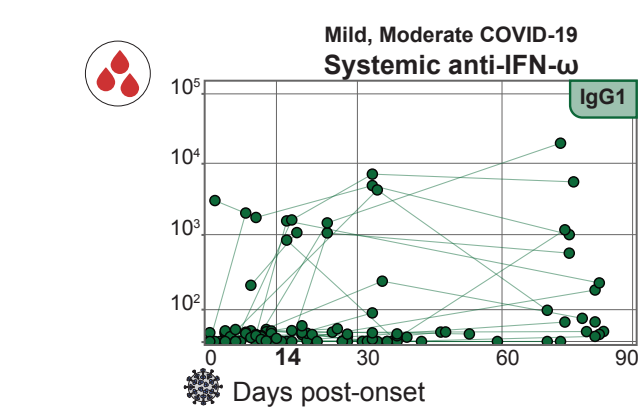

**Fig. S4: Anti-NSP nasal-specific programs and additional induced isotypes of anti-IFN- $\alpha$ 2a**

(A) Anti-NSP7, NSP8 and ORF9a signals comprise a nasal-specific anti-NSP antibody response rarely detected in the blood of mild and moderate COVID-19 donors. (B) Additional longitudinal plots of anti-IFN- $\alpha$ 2a-specific isotypes of nasal and systemic autoantibodies depict isotypes not displayed in Fig. 3A and 3C. Longitudinal samples of individual donors are linked by solid lines. Loess regressions plotted as solid black lines with shaded standard error. (C) Longitudinal plots of anti-IFN- $\omega$ -specific isotypes of nasal and systemic autoantibodies.

**A**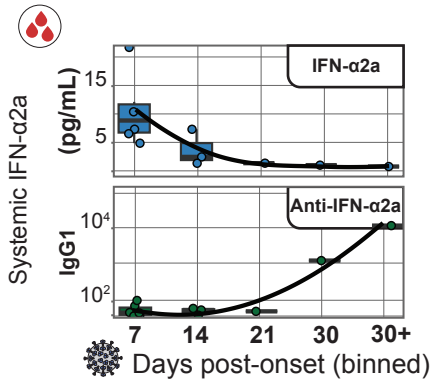**B**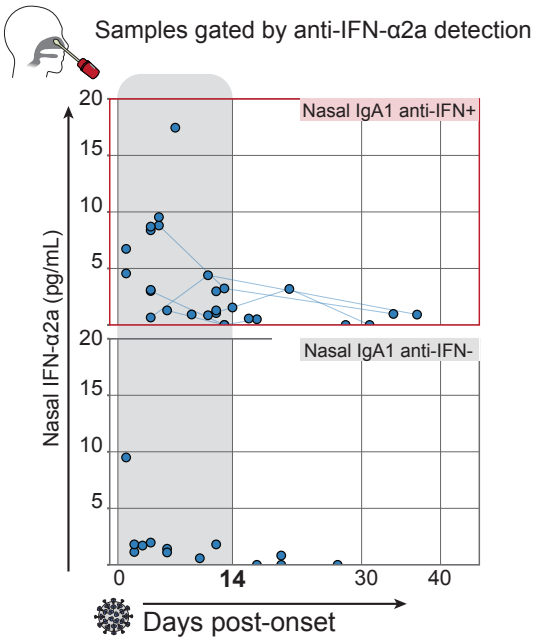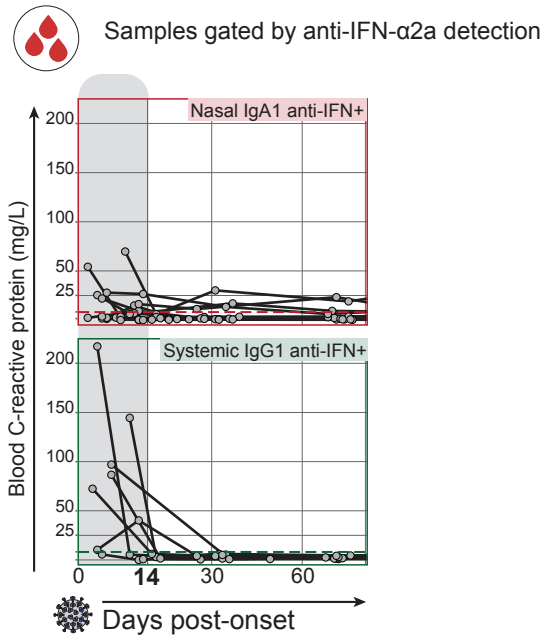

**Fig. S5: Signals of inflammation and viral load in mild and moderate COVID-19 anti-IFN- $\alpha$ 2a producers**

**(A)** Systemic IFN- $\alpha$ 2a cytokine levels and corresponding systemic anti-IFN- $\alpha$ 2a from the same samples. Points binned by days post-onset, as indicated in X-axis. **(B)** Longitudinal plots of nasal IFN- $\alpha$ 2a cytokine (nasal, left) and systemic CRP (systemic, right), divided by nasal IgA1 anti-IFN- $\alpha$ 2a-positive (left, red) and nasal IgA1 anti-IFN- $\alpha$ 2a-negative (left, gray) or nasal IgA1 anti-IFN- $\alpha$ 2a-positive (right, red) and systemic IgG1 anti-IFN- $\alpha$ 2a-positive (right, green). Gates for relevant populations (red, green, gray color-coded) depicted in Fig. 3C.

**A**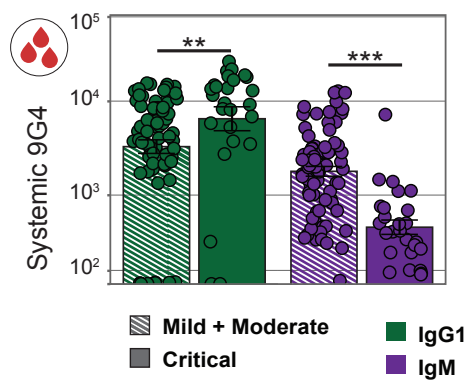**B**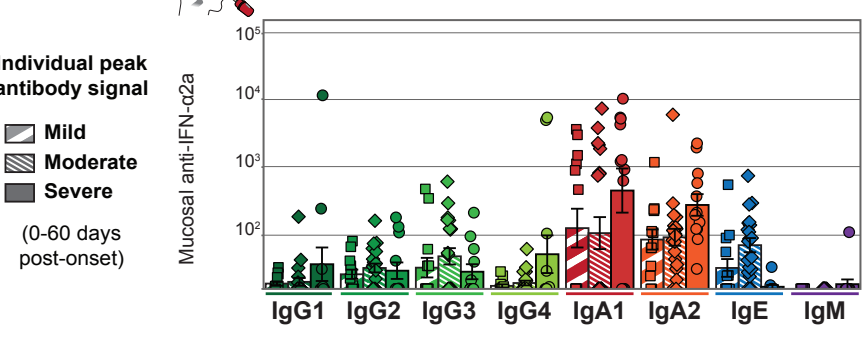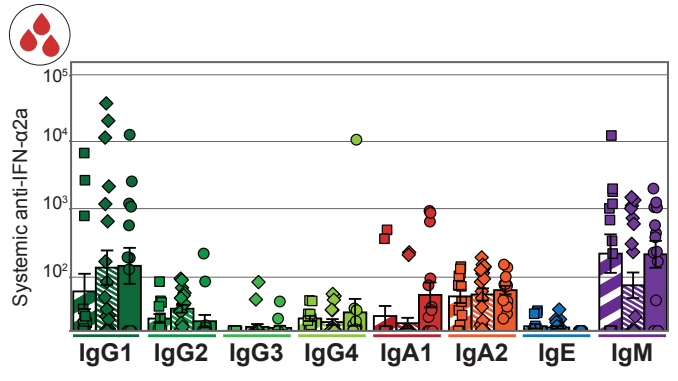**C**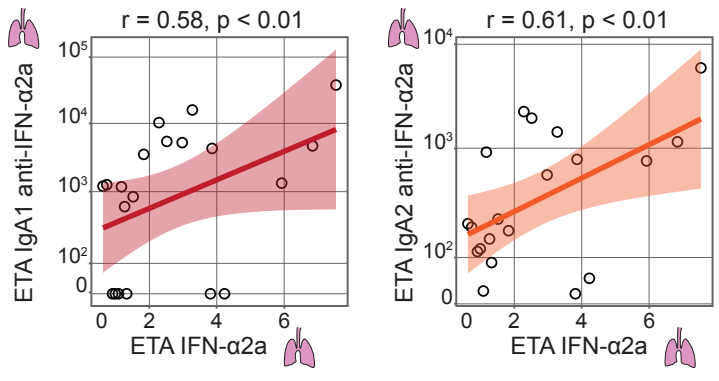

**Fig. S6: Additional isotypes of autoreactive antibody response in mild, moderate, and severe COVID-19**

**(A)** Bar plot of systemic VH4-34 antibody detection (Y-axis) divided by isotype (color) and COVID-19 severity (pattern). Signal depicted is maximum signal detected over acute COVID-19 infection. Wilcoxon rank-sum test,  $p < 0.01$ ,  $p < 0.001$  as indicated. **(B)** Bar plot of systemic and airway anti-IFN- $\alpha$ 2a (Y-axis) divided by isotype (color) and COVID-19 severity (pattern). Signal depicted is maximum signal detected over acute COVID-19 infection. **(C)** Correlation plots of ETA anti-IFN- $\alpha$ 2a and ETA IFN- $\alpha$ 2a cytokine levels in critical COVID-19 patients. Pearson product moment correlation coefficient,  $p < 0.01$ .
